# Supplementary material
Source: Springer Nature journal article supplement (https://www.springermedizin.de/resource/supplementary/12990_2007_108_MOESM7_ESM.pdf/9612588)

# Insula

Pain Indicated  
by Patient (t=0)

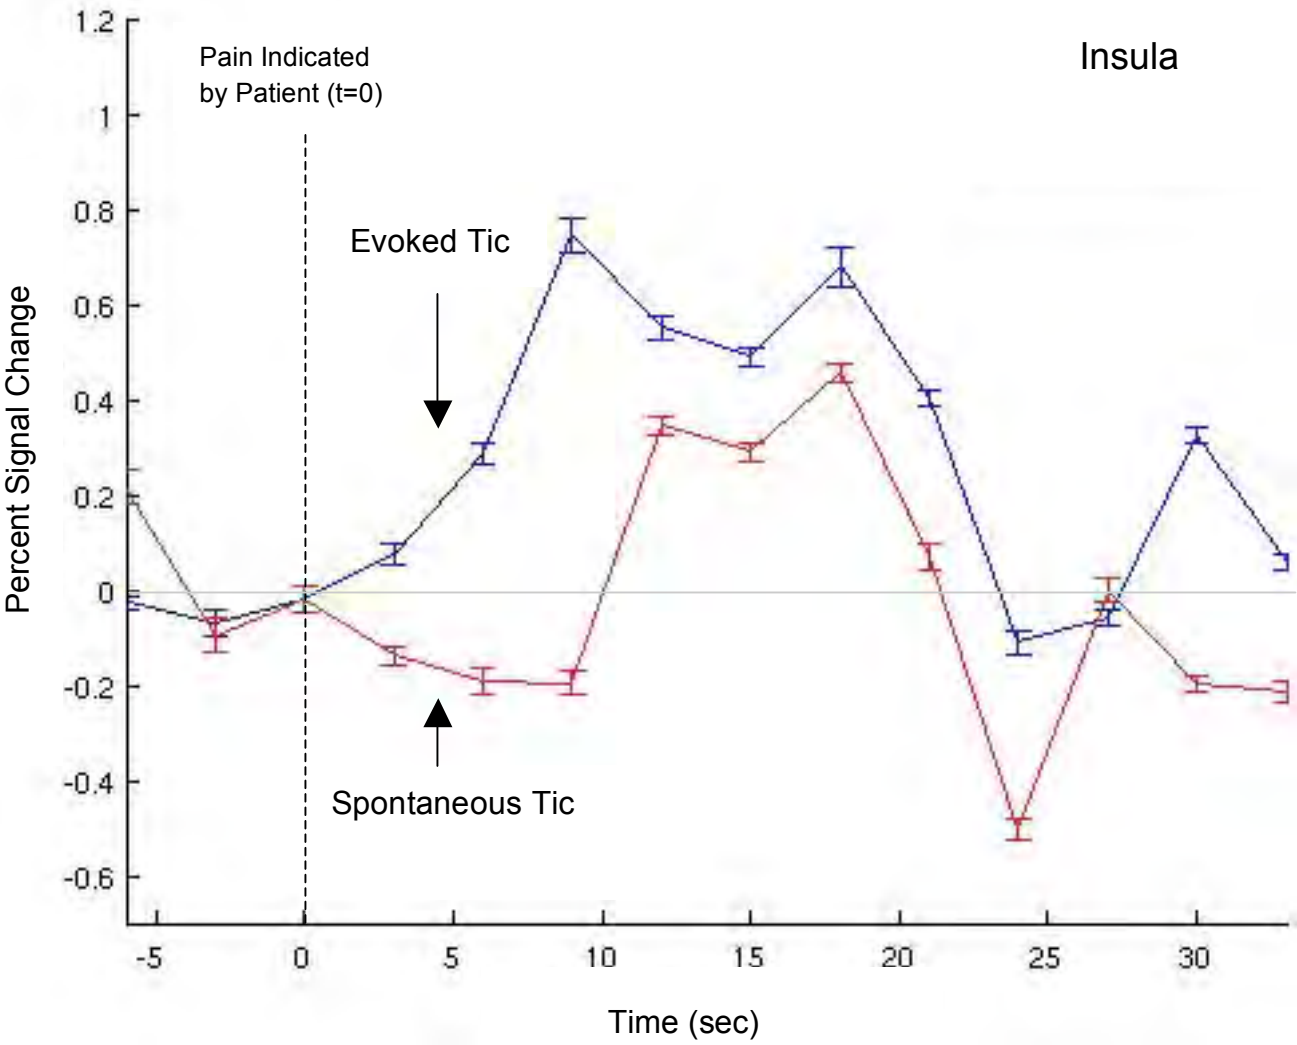

Supplement: MOESM7 [file 9612588]
